# Supplementary figures and images for: Activities of visual cortical and hippocampal neurons co-fluctuate in freely moving rats during spatial behavior
Source: eLife journal article supplement (doi:10.7554/elife.08902), 2015-09-08

Figure 6 – figure supplement 3

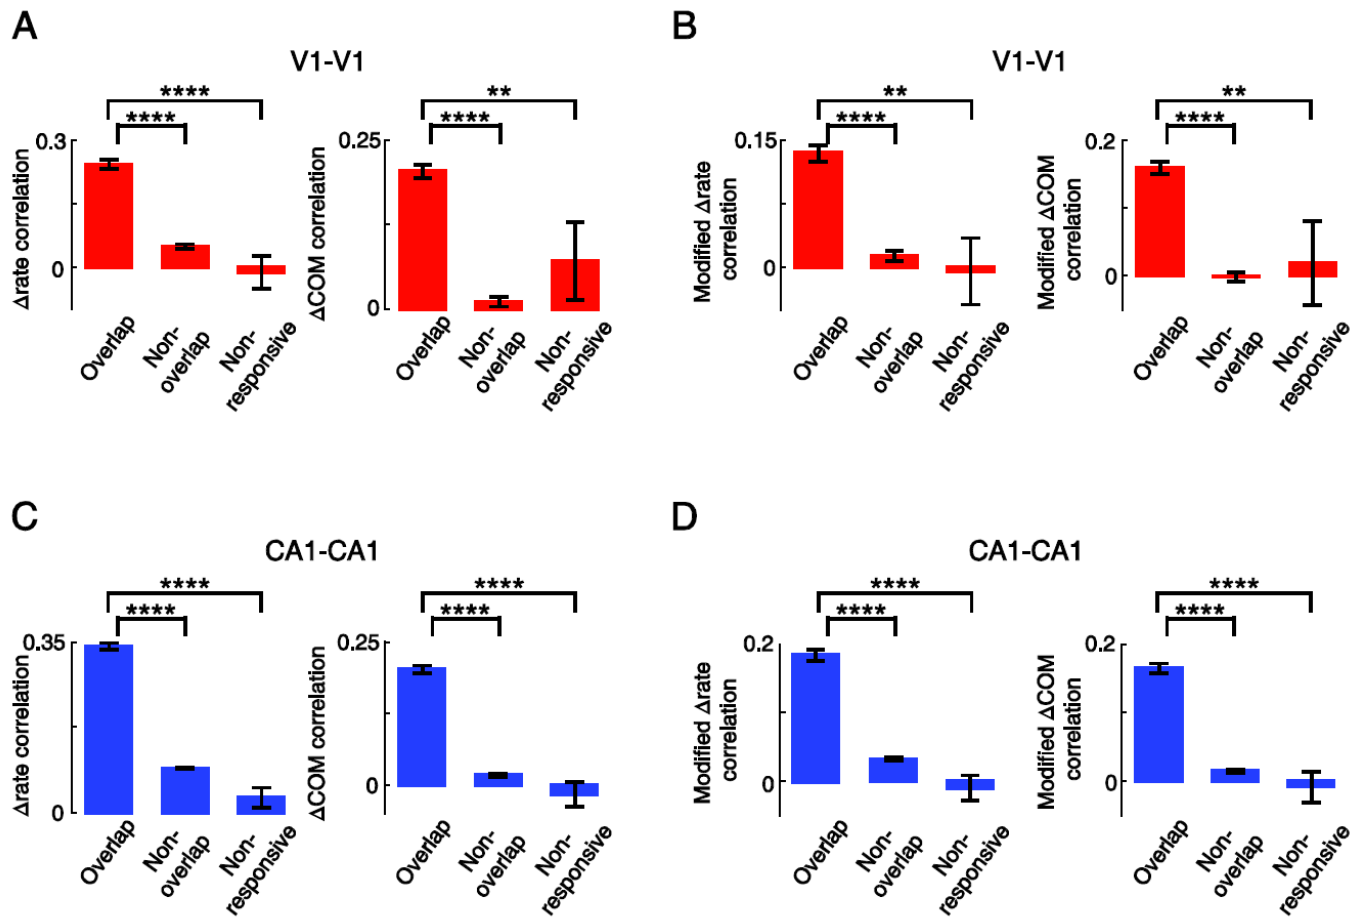

Supplement: supp [file elife-08902-supp-v1.zip]

**Figure 2 – figure supplement 1**

**A**

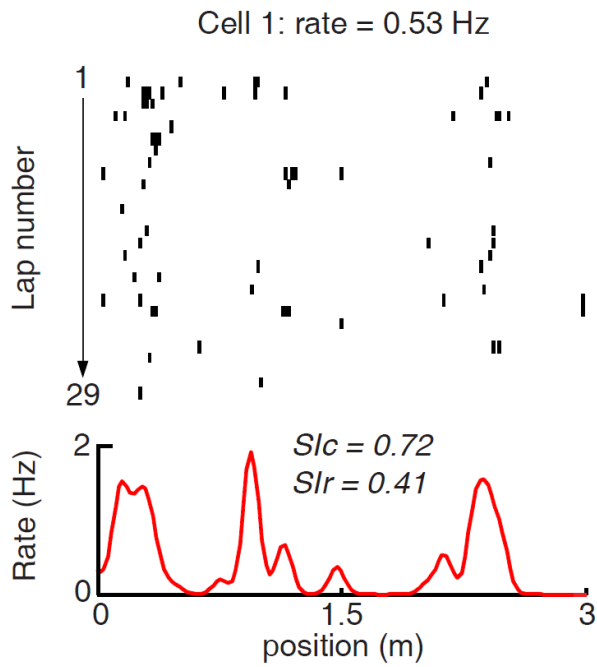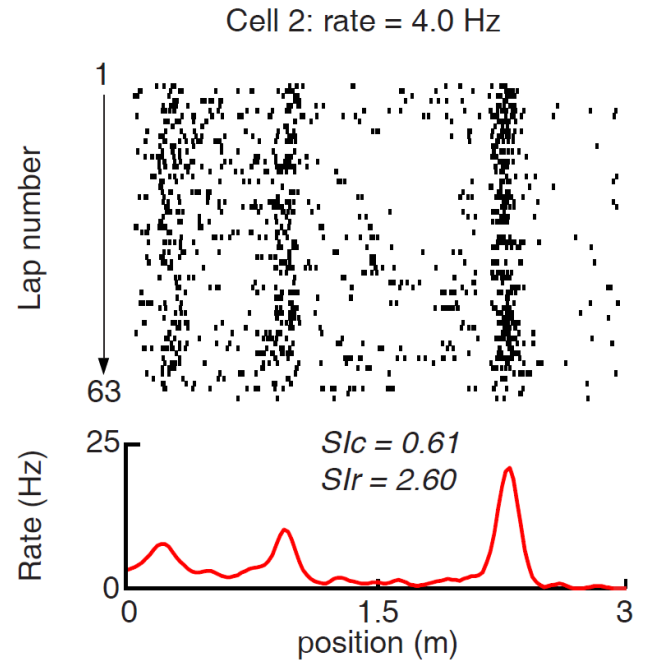

**B**

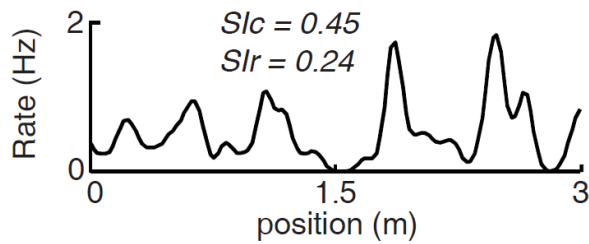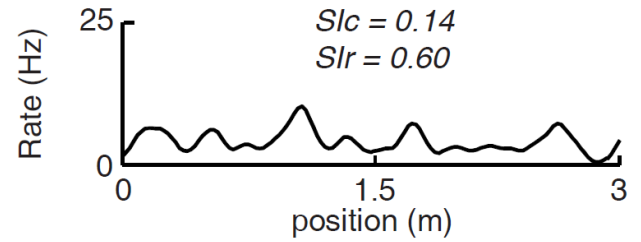

**C**

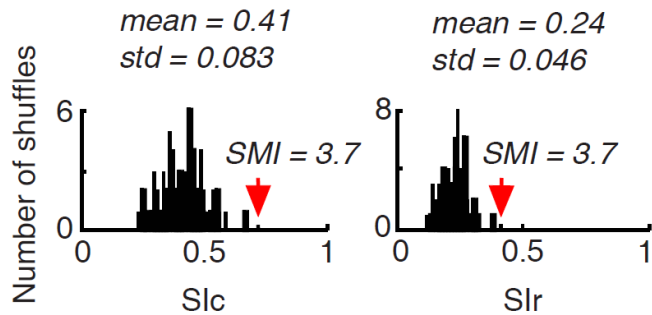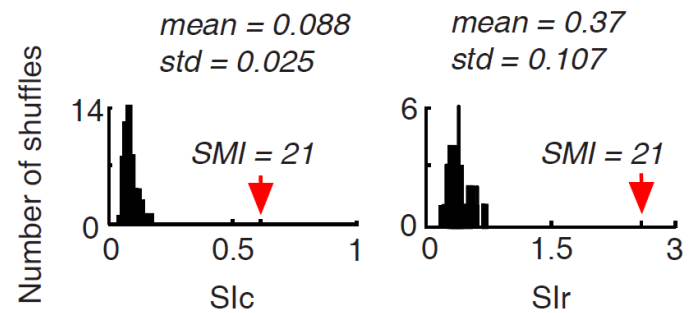

Supplement: supp [file elife-08902-supp-v1.zip]

**Figure 6 – figure supplement 5**

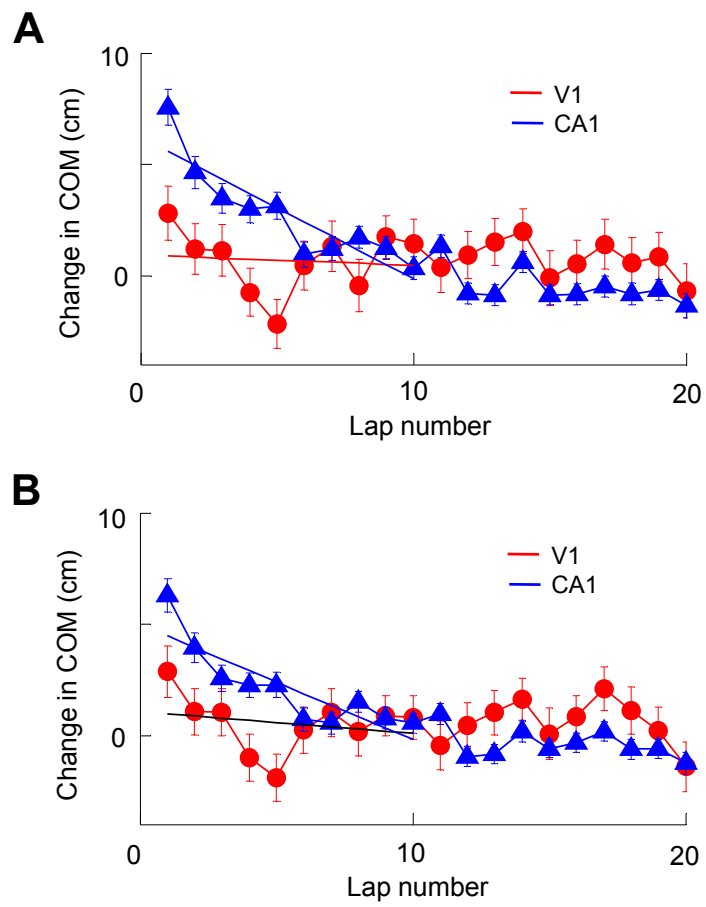

Supplement: supp [file elife-08902-supp-v1.zip]

**Figure 6 – figure supplement 4**

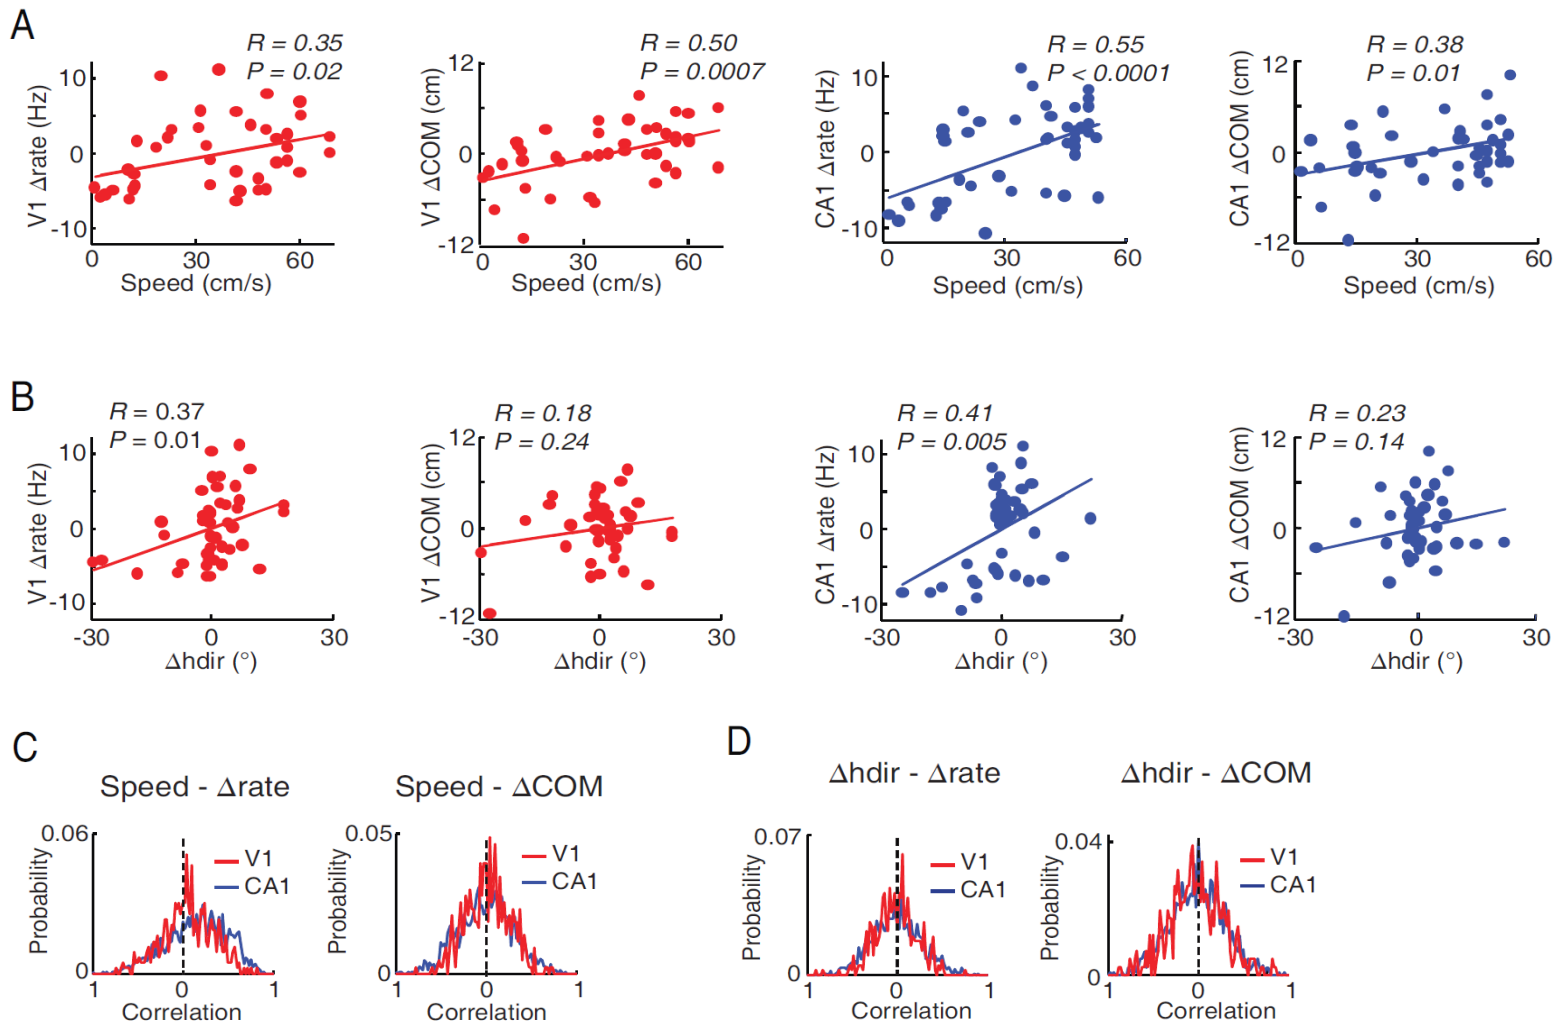

Supplement: supp [file elife-08902-supp-v1.zip]

**Figure 6 – figure supplement 1**

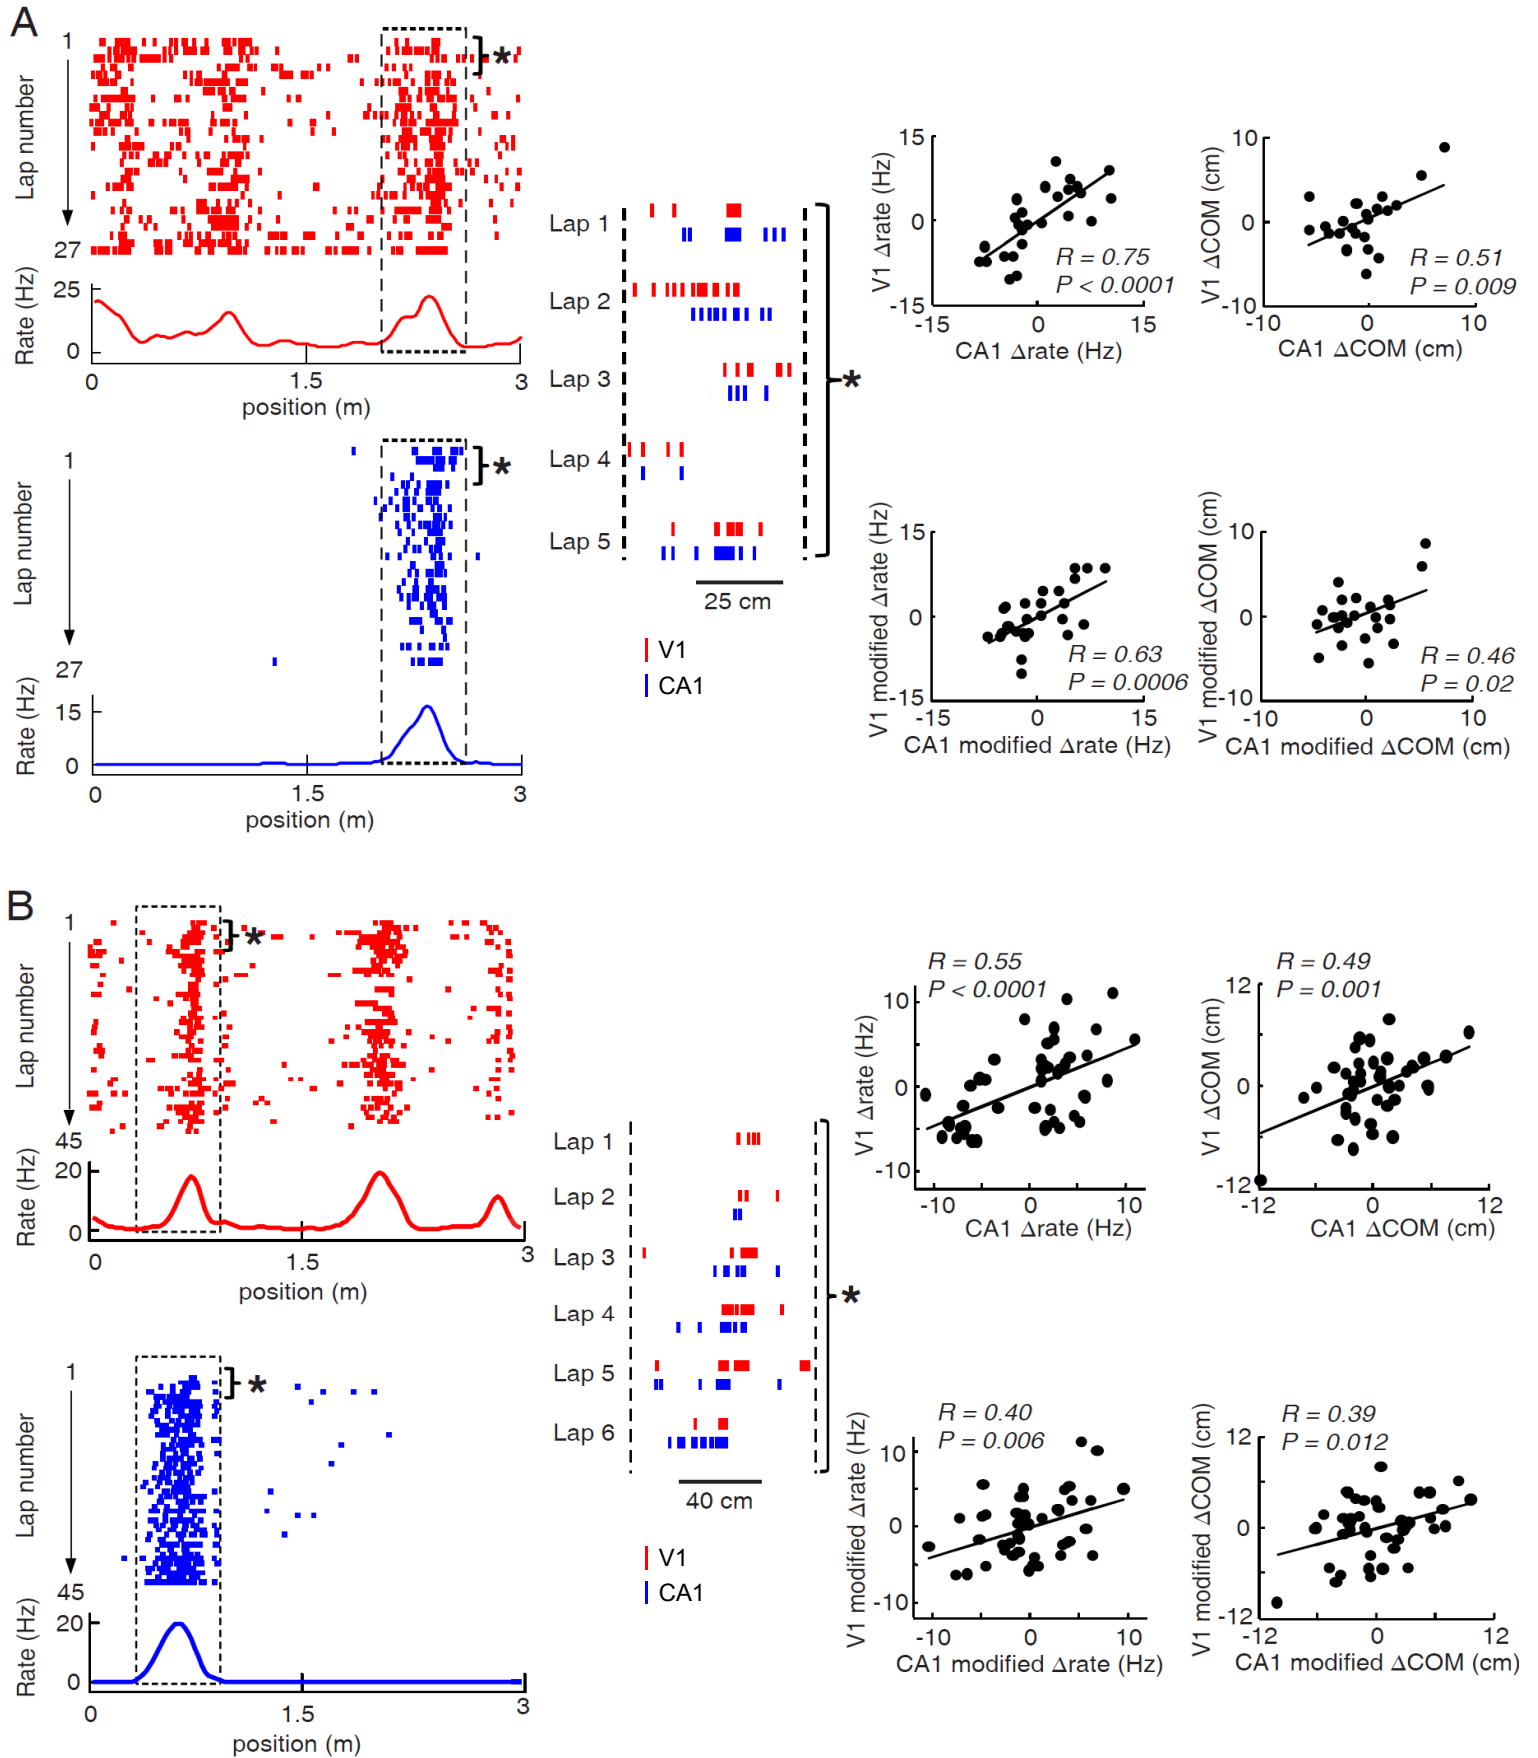

Supplement: supp [file elife-08902-supp-v1.zip]

Figure 6 – figure supplement 2

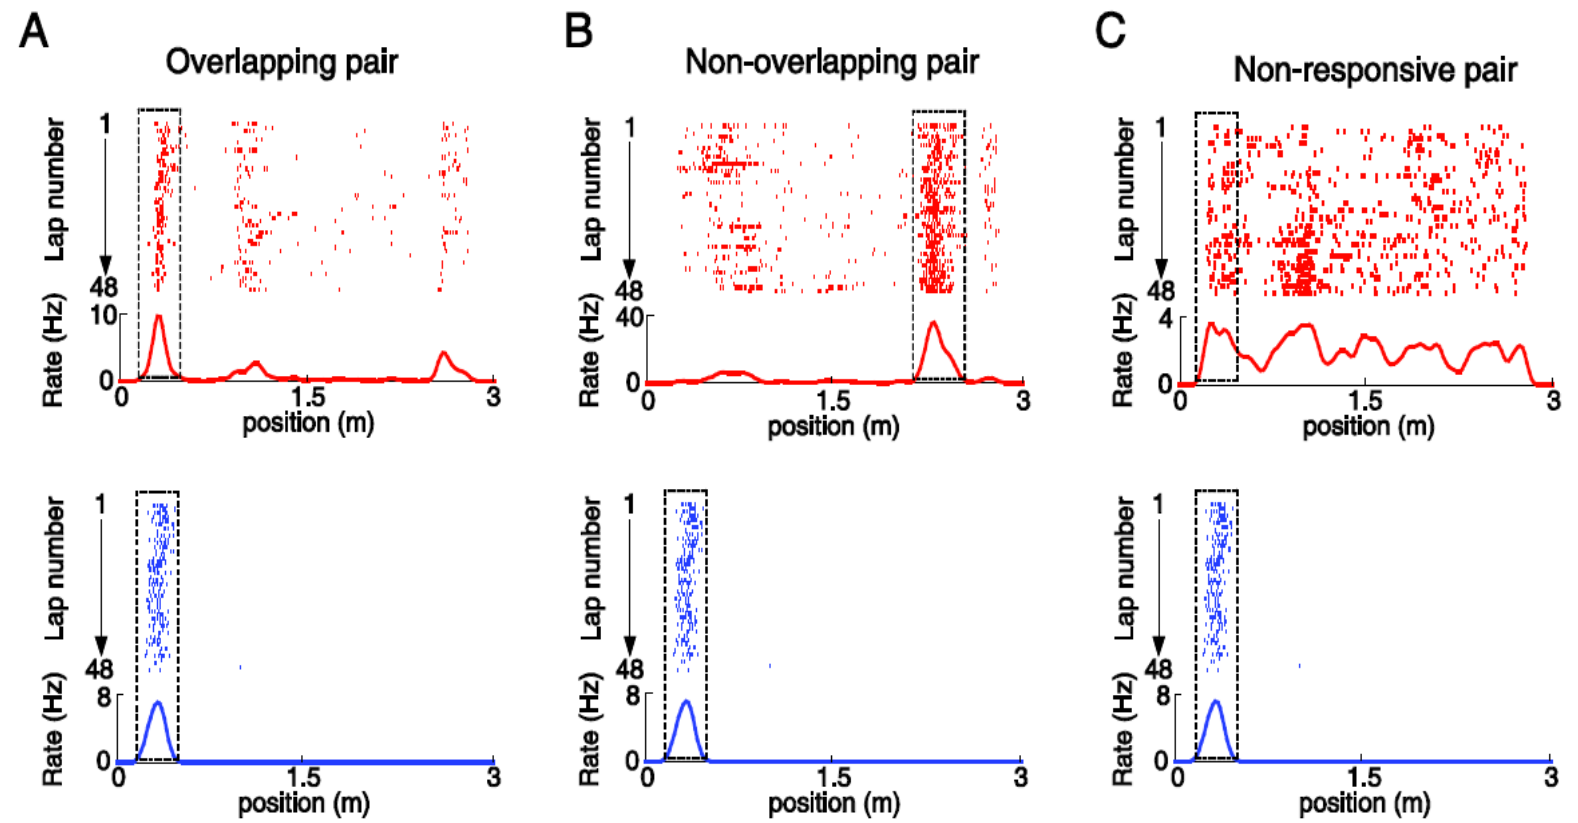

Supplement: supp [file elife-08902-supp-v1.zip]
